# Supplementary material for: Enhanced Succinate Oxidation with Mitochondrial Complex II Reactive Oxygen Species Generation in Human Prostate Cancer
Source: MDPI journal article supplement (doi:10.3390/ijms232012168), 2022-10-12
Supplement: s1 [file s1]

**Table S1.** Patient demographics and prostate biopsy characteristics.

| <b>Patients</b>                        |                  |
|----------------------------------------|------------------|
| Total                                  | 27               |
| Age (years)                            |                  |
| Average (mean $\pm$ SD)                | 64.74 $\pm$ 6.87 |
| Range                                  | 53 - 76          |
| <b>Prostate gland</b>                  |                  |
| Total glands procured for biopsy       | 23               |
| Gleason Score <sup>1</sup>             |                  |
| 3+3, 3+4                               | 9                |
| 4+3, 4+4, 4+5                          | 14               |
| <b>Biopsy</b>                          |                  |
| Total biopsies <sup>2</sup>            | 96               |
| 3+X non-malignant                      | 27               |
| 3+X malignant                          | 13               |
| 4+X non-malignant                      | 40               |
| 4+X malignant                          | 16               |
| Percentage of malignant biopsies/gland |                  |
| < 25%                                  | 10               |
| $\geq$ 26% and <50%                    | 3                |
| $\geq$ 50% and <75%                    | 7                |
| $\geq$ 75%                             | 3                |

<sup>1</sup> clinical post-operative Gleason Score. <sup>2</sup> individual experimental biopsy Gleason Score.
